# Supplementary material
Source: ML conference proceedings conference paper supplement (https://openreview.net/forum?id=1QTkoX8XHD)
Supplement: supplementary_material [file appendix.pdf › supplementary material/appendix.pdf]

## A APPENDIX

### A.1 NETWORKS

Table 1: Network architectures.

|                                                                                     |
|-------------------------------------------------------------------------------------|
| <b>FeatNet</b>                                                                      |
| 2C9(6C9)-9C16-16C32-32C64-FC256-FC128-L2Norm for the COFW (300W) dataset            |
| <b>CoordNet</b>                                                                     |
| 2C9(6C9)-9C16-16C32-32C64-64C128-FC128-L2Norm-FC2-Tanh for the COFW (300W) dataset  |
| <b>RelCoordNet</b>                                                                  |
| 4C9(8C9)-9C16-16C32-32C64-64C128-FC128-L2Norm-FC2-2Tanh for the COFW (300W) dataset |
| <b>dirPolNet</b>                                                                    |
| FC512-FC256-FC8-Softmax                                                             |

All convolution layers have the same kernel height and width,  $k_H = k_W = 3$ ,  $s = 2$ ,  $p = 1$ .

Table 2: Hyperparameters used.

|             | FeatNet    | (Rel)CoordNet                      | dirPolNet |
|-------------|------------|------------------------------------|-----------|
| Optimizer   | Adam       | Adam                               | Adam      |
| # Epochs    | 2000       | 2000                               | 1000      |
| Batch size  | 256        | 64                                 | 128       |
| Initial lr  | 1E-2       | 1E-2 for projection, 1E-3 for head | 5E-4      |
| Lr decay    | 0.1        | 0.1                                | -         |
| Decay epoch | 1500epochs | 1000epochs                         | -         |

#### FeatNet.

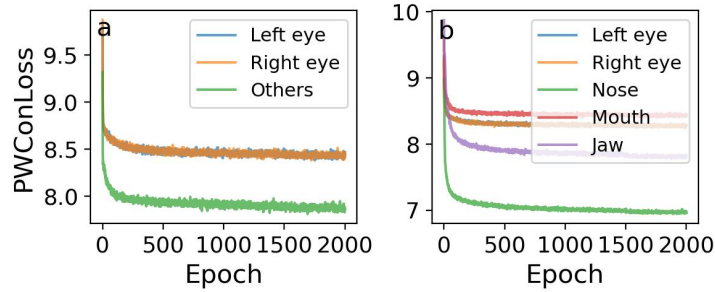

Figure 1: Learning curves of FeatNet for each group on (a) COFW and (b) 300W.

Fig. 1 represents the learning curves of FeatNet. Due to variations in inter-landmark spatial distances across different groups and differing probabilities that a randomly sampled observation becomes a positive pair for a specific landmark, the absolute values of the PWConLoss vary accordingly. Fig. 2 represents the results of using  $\mathbf{o}_{0:2C,::}$  and the full observation  $\mathbf{o}$  as the input to FeatNet. The results indicate that the difference is negligible.

#### CoordNet/RelCoordNet.

Fig. 3 represents the learning curves of CoordNet and RelCoordNet. Our CoordNet achieves highly accurate coordinate regression with errors of only 2.24 pixels. Although RelCoordNet shows slightly lower accuracy due to the more complex task, it still maintains high accuracy with an error of 3.49 pixels. Fig. 4 represents the results of using  $\mathbf{o}_{C:3C,::}$  and the full observation  $\mathbf{o}$  as the input to CoordNet. The results indicate that the difference is negligible.

**dirPolNet.** Fig. 5 represents the learning curves of dirPolNet. The cross-entropy loss is used. Similar to FeatNet, separate dirPolNet with distinct parameters is used for each group in the dataset.

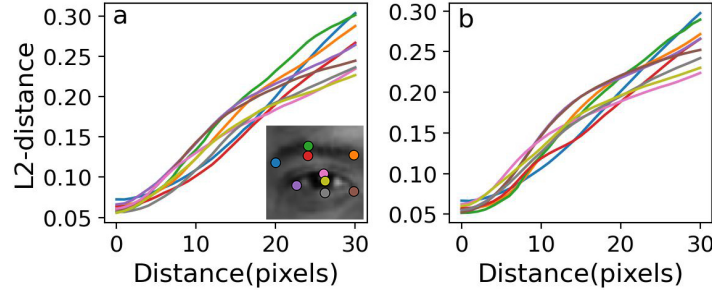

Figure 2: L2 distances between feature embeddings and landmarks at varying spatial distances from the landmarks in the inset for FeatNet (a) with  $o_{0:2C,:}$  and (b) with  $o$ .

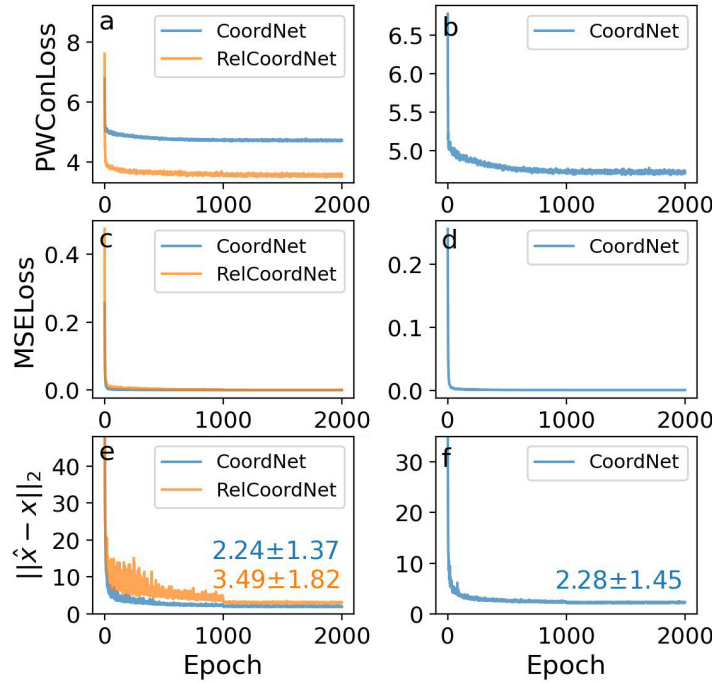

Figure 3: Learning curves of CoordNet and RelCoordNet. PWConLoss on (a) COFW and (b) 300W, MSELoss for regression head on (c) COFW and (d) 300W, coordinate regression error on (e) COFW and (f) 300W.

Table 3: Detection performance with different prior knowledge on COFW.

|       | $z_{c,ft}^* = \mu_{z_{ft} c}$<br>$z_{c,cd}^* = \mu_{z_{cd} c}$ | $z_{c,ft}^* \sim p(z_{ft} c)$<br>$z_{c,cd}^* \sim p(z_{cd} c)$ |
|-------|----------------------------------------------------------------|----------------------------------------------------------------|
| NME   | 8.28                                                           | 8.92                                                           |
| $T_d$ | 10.42                                                          | 20.35                                                          |

## A.2 PRIOR KNOWLEDGE

We used the means  $\mu_{z_{ft}|c}$  and  $\mu_{z_{cd}|c}$  as prior knowledge  $z_{c,ft}^*$  and  $z_{c,cd}^*$ , respectively. Table 3 presents the results when the prior knowledge was sampled at each step using reparameterization trick with  $\mu_{z_{ft}|c}, \mu_{z_{cd}|c}, \sigma_{z_{ft}|c}^2, \sigma_{z_{cd}|c}^2$ . Using only means  $\mu_{z_{ft}|c}, \mu_{z_{cd}|c}$  results in lower NME and  $T_d$ .

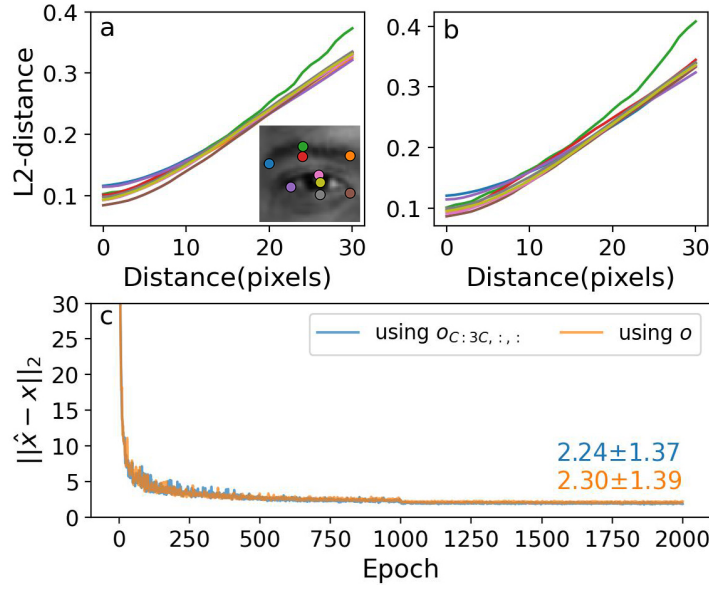

Figure 4: L2 distances between coordinate embeddings and landmarks at varying spatial distances from the landmarks in the inset for CoordNet with (a)  $o_{C:3C, :, :}$  and (b)  $o$ . (c) Coordinate regression error for CoordNet with  $o_{C:3C, :, :}$  and  $o$ .

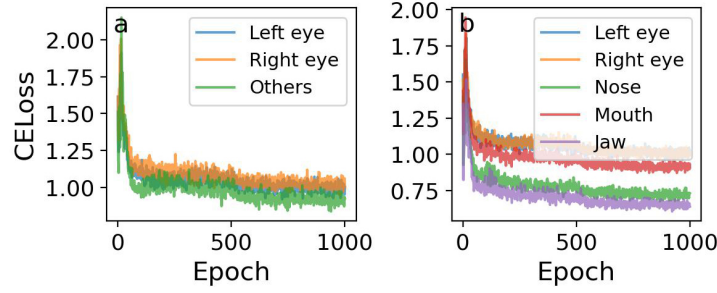

Figure 5: Learning curves of dirPolNet for each group on (a) COFW and (b) 300W.

Table 4: Detection hyperparameters.

| Symbol               | Definition                               |
|----------------------|------------------------------------------|
| $\theta_{d,min}$     | Initial threshold                        |
| $\Delta\theta_d$     | Increase of threshold                    |
| $T_{d,up}$           | Threshold increase starting time         |
| $\lambda_{ft,max}$   | Initial balance parameter                |
| $\Delta\lambda_{ft}$ | Decrease of balance parameter            |
| $T_{d,down}$         | Balance parameter decrease starting time |

### A.3 DETECTION HYPERPARAMETERS

The detection hyperparameters are described in Table 4. We use two-stage detection technique. The landmark-wise, stage-wise hyperparameter configuration are detailed in Table 5 (COFW) and Table 6 (300W).

### A.4 PSEUDOCODE

**Algorithm 1** summarizes the overall procedure of the two-stage detection process for landmark  $c$ .

Table 5: Landmark-wise, stage-wise hyperparameter configuration on COFW.

|                      | 1             | 2             | 3             | 4             | 5             | 6             | 7             | 8             |
|----------------------|---------------|---------------|---------------|---------------|---------------|---------------|---------------|---------------|
| $\theta_{d,min}$     | 0.009 / 0.002 | 0.003 / 0.001 | 0.006 / 0.002 | 0.010 / 0.004 | 0.006 / 0.002 | 0.006 / 0.002 | 0.004 / 0.002 | 0.008 / 0.003 |
| $\Delta\theta_d$     | 0.004 / 0.002 | 0.003 / 0.002 | 0.003 / 0.001 | 0.003 / 0.001 | 0.003 / 0.001 | 0.003 / 0.001 | 0.004 / 0.001 | 0.003 / 0.001 |
| $T_{d,up}$           | 7 / 1         | 1 / 2         | 1 / 2         | 9 / 1         | 1 / 2         | 1 / 2         | 1 / 3         | 4 / 3         |
| $\lambda_{ft,max}$   | 0.89 / 0.90   | 0.99 / 0.99   | 0.79 / 0.81   | 0.78 / 0.82   | 0.79 / 0.81   | 0.79 / 0.81   | 0.73 / 0.90   | 0.91 / 0.97   |
| $\Delta\lambda_{ft}$ | 0.18 / 0.08   | 0.16 / 0.09   | 0.18 / 0.10   | 0.19 / 0.07   | 0.18 / 0.10   | 0.18 / 0.10   | 0.18 / 0.08   | 0.15 / 0.09   |
| $T_{d,down}$         | 6 / 6         | 9 / 7         | 5 / 5         | 9 / 9         | 5 / 5         | 5 / 5         | 9 / 10        | 7 / 8         |
|                      | 9             | 10            | 11            | 12            | 13            | 14            | 15            | 16            |
| $\theta_{d,min}$     | 0.006 / 0.002 | 0.009 / 0.003 | 0.006 / 0.002 | 0.005 / 0.002 | 0.010 / 0.003 | 0.006 / 0.002 | 0.008 / 0.002 | 0.009 / 0.002 |
| $\Delta\theta_d$     | 0.003 / 0.001 | 0.004 / 0.001 | 0.003 / 0.001 | 0.005 / 0.001 | 0.004 / 0.002 | 0.003 / 0.001 | 0.004 / 0.001 | 0.004 / 0.001 |
| $T_{d,up}$           | 1 / 2         | 1 / 3         | 1 / 2         | 3 / 3         | 2 / 1         | 1 / 2         | 5 / 4         | 4 / 3         |
| $\lambda_{ft,max}$   | 0.79 / 0.81   | 0.94 / 0.98   | 0.79 / 0.81   | 0.78 / 0.84   | 0.83 / 0.84   | 0.79 / 0.81   | 0.93 / 0.99   | 0.89 / 0.98   |
| $\Delta\lambda_{ft}$ | 0.18 / 0.10   | 0.19 / 0.09   | 0.18 / 0.10   | 0.16 / 0.07   | 0.14 / 0.08   | 0.18 / 0.10   | 0.12 / 0.08   | 0.19 / 0.09   |
| $T_{d,down}$         | 5 / 5         | 9 / 5         | 5 / 5         | 7 / 7         | 8 / 7         | 5 / 5         | 9 / 5         | 8 / 5         |
|                      | 17            | 18            | 19            | 20            | 21            | 22            | 23            | 24            |
| $\theta_{d,min}$     | 0.006 / 0.002 | 0.005 / 0.002 | 0.008 / 0.003 | 0.009 / 0.004 | 0.007 / 0.003 | 0.010 / 0.003 | 0.009 / 0.002 | 0.008 / 0.003 |
| $\Delta\theta_d$     | 0.003 / 0.001 | 0.005 / 0.001 | 0.004 / 0.002 | 0.004 / 0.002 | 0.002 / 0.001 | 0.003 / 0.001 | 0.004 / 0.002 | 0.003 / 0.001 |
| $T_{d,up}$           | 1 / 2         | 3 / 3         | 6 / 1         | 8 / 1         | 1 / 1         | 5 / 1         | 2 / 2         | 3 / 2         |
| $\lambda_{ft,max}$   | 0.79 / 0.81   | 0.78 / 0.84   | 0.74 / 0.76   | 0.73 / 0.74   | 0.77 / 0.91   | 0.96 / 0.99   | 0.76 / 0.99   | 0.94 / 0.96   |
| $\Delta\lambda_{ft}$ | 0.18 / 0.10   | 0.16 / 0.07   | 0.16 / 0.07   | 0.11 / 0.06   | 0.16 / 0.09   | 0.14 / 0.10   | 0.18 / 0.06   | 0.13 / 0.10   |
| $T_{d,down}$         | 5 / 5         | 7 / 7         | 8 / 7         | 6 / 8         | 8 / 7         | 7 / 7         | 7 / 6         | 5 / 9         |
|                      | 25            | 26            | 27            | 28            | 29            |               |               |               |
| $\theta_{d,min}$     | 0.008 / 0.003 | 0.010 / 0.003 | 0.006 / 0.002 | 0.010 / 0.003 | 0.009 / 0.003 |               |               |               |
| $\Delta\theta_d$     | 0.004 / 0.002 | 0.003 / 0.001 | 0.004 / 0.002 | 0.003 / 0.001 | 0.004 / 0.002 |               |               |               |
| $T_{d,up}$           | 4 / 2         | 5 / 1         | 3 / 2         | 5 / 1         | 3 / 4         |               |               |               |
| $\lambda_{ft,max}$   | 0.77 / 0.93   | 0.96 / 0.99   | 0.90 / 0.96   | 0.96 / 0.99   | 0.87 / 0.91   |               |               |               |
| $\Delta\lambda_{ft}$ | 0.15 / 0.08   | 0.14 / 0.10   | 0.14 / 0.07   | 0.14 / 0.10   | 0.14 / 0.07   |               |               |               |
| $T_{d,down}$         | 6 / 7         | 7 / 7         | 9 / 5         | 7 / 7         | 6 / 6         |               |               |               |

## A.5 LANDMARK-WISE PERFORMANCE

The landmark-wise detection performance is detailed in Table 7 (COFW) and Table 8 (300W).

Table 6: Landmark-wise, stage-wise hyperparameter configuration on 300W.

|                      | 1             | 2             | 3             | 4             | 5             | 6             | 7             | 8             |
|----------------------|---------------|---------------|---------------|---------------|---------------|---------------|---------------|---------------|
| $\theta_{d,min}$     | 0.005 / 0.002 | 0.008 / 0.008 | 0.005 / 0.002 | 0.009 / 0.005 | 0.006 / 0.001 | 0.004 / 0.002 | 0.003 / 0.001 | 0.010 / 0.002 |
| $\Delta\theta_d$     | 0.005 / 0.002 | 0.005 / 0.005 | 0.005 / 0.002 | 0.005 / 0.002 | 0.004 / 0.002 | 0.004 / 0.002 | 0.005 / 0.001 | 0.004 / 0.002 |
| $T_{d,up}$           | 4 / 6         | 1 / 1         | 1 / 1         | 1 / 4         | 5 / 3         | 5 / 2         | 3 / 1         | 5 / 1         |
| $\lambda_{ft,max}$   | 0.78 / 0.99   | 0.80 / 0.80   | 0.85 / 0.97   | 0.79 / 0.91   | 0.95 / 0.96   | 0.95 / 0.95   | 0.97 / 0.99   | 0.88 / 0.97   |
| $\Delta\lambda_{ft}$ | 0.11 / 0.10   | 0.11 / 0.11   | 0.10 / 0.07   | 0.10 / 0.10   | 0.18 / 0.10   | 0.11 / 0.07   | 0.15 / 0.07   | 0.14 / 0.06   |
| $T_{d,down}$         | 5 / 9         | 8 / 8         | 10 / 7        | 10 / 9        | 6 / 5         | 10 / 8        | 10 / 8        | 6 / 10        |
|                      | 9             | 10            | 11            | 12            | 13            | 14            | 15            | 16            |
| $\theta_{d,min}$     | 0.005 / 0.002 | 0.004 / 0.004 | 0.005 / 0.002 | 0.003 / 0.001 | 0.003 / 0.001 | 0.010 / 0.004 | 0.010 / 0.004 | 0.010 / 0.005 |
| $\Delta\theta_d$     | 0.003 / 0.001 | 0.003 / 0.003 | 0.004 / 0.002 | 0.005 / 0.001 | 0.004 / 0.002 | 0.002 / 0.001 | 0.004 / 0.002 | 0.005 / 0.002 |
| $T_{d,up}$           | 3 / 2         | 4 / 4         | 4 / 2         | 1 / 1         | 1 / 2         | 5 / 1         | 9 / 1         | 1 / 3         |
| $\lambda_{ft,max}$   | 0.83 / 0.98   | 0.86 / 0.86   | 0.94 / 0.99   | 0.95 / 0.98   | 0.90 / 0.91   | 0.94 / 0.95   | 0.78 / 0.88   | 0.73 / 0.80   |
| $\Delta\lambda_{ft}$ | 0.12 / 0.06   | 0.18 / 0.18   | 0.17 / 0.07   | 0.15 / 0.10   | 0.16 / 0.08   | 0.14 / 0.07   | 0.13 / 0.07   | 0.18 / 0.09   |
| $T_{d,down}$         | 6 / 9         | 7 / 7         | 8 / 7         | 5 / 7         | 7 / 6         | 7 / 5         | 8 / 8         | 10 / 6        |
|                      | 17            | 18            | 19            | 20            | 21            | 22            | 23            | 24            |
| $\theta_{d,min}$     | 0.003 / 0.001 | 0.009 / 0.009 | 0.006 / 0.001 | 0.009 / 0.003 | 0.003 / 0.001 | 0.005 / 0.001 | 0.010 / 0.001 | 0.010 / 0.001 |
| $\Delta\theta_d$     | 0.005 / 0.002 | 0.003 / 0.003 | 0.005 / 0.002 | 0.004 / 0.002 | 0.004 / 0.002 | 0.004 / 0.002 | 0.002 / 0.001 | 0.002 / 0.001 |
| $T_{d,up}$           | 5 / 1         | 8 / 8         | 1 / 5         | 2 / 2         | 3 / 7         | 1 / 5         | 5 / 5         | 5 / 5         |
| $\lambda_{ft,max}$   | 0.91 / 0.92   | 0.99 / 0.99   | 1.00 / 1.00   | 0.93 / 1.00   | 0.99 / 0.99   | 0.88 / 1.00   | 0.90 / 1.00   | 0.90 / 1.00   |
| $\Delta\lambda_{ft}$ | 0.14 / 0.07   | 0.20 / 0.20   | 0.12 / 0.07   | 0.11 / 0.06   | 0.14 / 0.08   | 0.13 / 0.06   | 0.20 / 0.05   | 0.20 / 0.05   |
| $T_{d,down}$         | 5 / 9         | 7 / 7         | 6 / 5         | 10 / 7        | 7 / 6         | 5 / 6         | 10 / 10       | 10 / 10       |
|                      | 25            | 26            | 27            | 28            | 29            | 30            | 31            | 32            |
| $\theta_{d,min}$     | 0.009 / 0.004 | 0.005 / 0.005 | 0.009 / 0.003 | 0.010 / 0.001 | 0.010 / 0.001 | 0.009 / 0.002 | 0.010 / 0.001 | 0.010 / 0.001 |
| $\Delta\theta_d$     | 0.004 / 0.001 | 0.005 / 0.005 | 0.003 / 0.001 | 0.002 / 0.001 | 0.002 / 0.001 | 0.004 / 0.002 | 0.002 / 0.001 | 0.002 / 0.001 |
| $T_{d,up}$           | 5 / 8         | 4 / 4         | 6 / 3         | 5 / 5         | 5 / 5         | 1 / 2         | 5 / 5         | 5 / 5         |
| $\lambda_{ft,max}$   | 0.86 / 0.97   | 0.95 / 0.95   | 0.97 / 0.98   | 0.90 / 1.00   | 0.90 / 1.00   | 0.98 / 0.99   | 0.90 / 1.00   | 0.90 / 1.00   |
| $\Delta\lambda_{ft}$ | 0.11 / 0.08   | 0.12 / 0.12   | 0.16 / 0.09   | 0.20 / 0.05   | 0.20 / 0.05   | 0.14 / 0.09   | 0.20 / 0.05   | 0.20 / 0.05   |
| $T_{d,down}$         | 9 / 7         | 6 / 6         | 10 / 9        | 10 / 10       | 10 / 10       | 5 / 8         | 10 / 10       | 10 / 10       |
|                      | 33            | 34            | 35            | 36            | 37            | 38            | 39            | 40            |
| $\theta_{d,min}$     | 0.010 / 0.001 | 0.010 / 0.010 | 0.010 / 0.001 | 0.010 / 0.001 | 0.003 / 0.001 | 0.009 / 0.002 | 0.009 / 0.002 | 0.009 / 0.002 |
| $\Delta\theta_d$     | 0.002 / 0.001 | 0.002 / 0.002 | 0.002 / 0.001 | 0.002 / 0.001 | 0.002 / 0.001 | 0.003 / 0.001 | 0.003 / 0.001 | 0.003 / 0.001 |
| $T_{d,up}$           | 5 / 5         | 5 / 5         | 5 / 5         | 5 / 5         | 5 / 2         | 8 / 1         | 8 / 1         | 8 / 1         |
| $\lambda_{ft,max}$   | 0.90 / 1.00   | 0.90 / 0.90   | 0.90 / 1.00   | 0.90 / 1.00   | 0.85 / 0.99   | 0.99 / 1.00   | 0.99 / 1.00   | 0.90 / 0.99   |
| $\Delta\lambda_{ft}$ | 0.20 / 0.05   | 0.20 / 0.20   | 0.20 / 0.05   | 0.20 / 0.05   | 0.20 / 0.07   | 0.20 / 0.08   | 0.20 / 0.08   | 0.20 / 0.08   |
| $T_{d,down}$         | 10 / 10       | 10 / 10       | 10 / 10       | 10 / 10       | 10 / 6        | 7 / 6         | 7 / 6         | 7 / 6         |
|                      | 41            | 42            | 43            | 44            | 45            | 46            | 47            | 48            |
| $\theta_{d,min}$     | 0.006 / 0.003 | 0.003 / 0.003 | 0.010 / 0.001 | 0.005 / 0.002 | 0.007 / 0.002 | 0.010 / 0.004 | 0.007 / 0.003 | 0.010 / 0.001 |
| $\Delta\theta_d$     | 0.004 / 0.002 | 0.002 / 0.002 | 0.002 / 0.001 | 0.003 / 0.001 | 0.004 / 0.001 | 0.002 / 0.001 | 0.005 / 0.001 | 0.002 / 0.001 |
| $T_{d,up}$           | 1 / 10        | 6 / 6         | 5 / 5         | 1 / 3         | 2 / 2         | 2 / 5         | 4 / 3         | 5 / 5         |
| $\lambda_{ft,max}$   | 0.91 / 1.00   | 1.00 / 1.00   | 0.90 / 1.00   | 0.99 / 0.99   | 0.92 / 0.95   | 0.91 / 0.96   | 0.96 / 0.99   | 0.90 / 1.00   |
| $\Delta\lambda_{ft}$ | 0.15 / 0.05   | 0.19 / 0.19   | 0.20 / 0.05   | 0.16 / 0.06   | 0.12 / 0.08   | 0.13 / 0.06   | 0.19 / 0.08   | 0.20 / 0.05   |
| $T_{d,down}$         | 10 / 6        | 7 / 7         | 10 / 10       | 6 / 8         | 8 / 7         | 6 / 6         | 6 / 6         | 10 / 10       |
|                      | 49            | 50            | 51            | 52            | 53            | 54            | 55            | 56            |
| $\theta_{d,min}$     | 0.001 / 0.001 | 0.004 / 0.004 | 0.007 / 0.003 | 0.010 / 0.001 | 0.010 / 0.003 | 0.009 / 0.004 | 0.007 / 0.003 | 0.007 / 0.003 |
| $\Delta\theta_d$     | 0.004 / 0.002 | 0.004 / 0.004 | 0.003 / 0.001 | 0.002 / 0.001 | 0.003 / 0.001 | 0.004 / 0.001 | 0.002 / 0.001 | 0.004 / 0.002 |
| $T_{d,up}$           | 1 / 3         | 1 / 1         | 10 / 2        | 5 / 5         | 10 / 2        | 8 / 6         | 1 / 1         | 4 / 2         |
| $\lambda_{ft,max}$   | 0.95 / 0.98   | 0.91 / 0.91   | 0.98 / 0.99   | 0.90 / 1.00   | 0.99 / 1.00   | 0.99 / 1.00   | 0.99 / 0.99   | 0.93 / 0.95   |
| $\Delta\lambda_{ft}$ | 0.14 / 0.06   | 0.15 / 0.15   | 0.11 / 0.08   | 0.20 / 0.05   | 0.15 / 0.05   | 0.18 / 0.09   | 0.19 / 0.08   | 0.12 / 0.09   |
| $T_{d,down}$         | 7 / 7         | 9 / 9         | 6 / 6         | 10 / 10       | 8 / 10        | 6 / 9         | 6 / 10        | 7 / 8         |
|                      | 57            | 58            | 59            | 60            | 61            | 62            | 63            | 64            |
| $\theta_{d,min}$     | 0.004 / 0.002 | 0.009 / 0.009 | 0.009 / 0.004 | 0.005 / 0.002 | 0.008 / 0.004 | 0.007 / 0.002 | 0.002 / 0.001 | 0.003 / 0.001 |
| $\Delta\theta_d$     | 0.004 / 0.001 | 0.005 / 0.005 | 0.004 / 0.001 | 0.003 / 0.001 | 0.004 / 0.002 | 0.003 / 0.002 | 0.003 / 0.001 | 0.004 / 0.002 |
| $T_{d,up}$           | 1 / 3         | 2 / 2         | 1 / 3         | 5 / 3         | 7 / 2         | 3 / 3         | 1 / 2         | 6 / 2         |
| $\lambda_{ft,max}$   | 0.93 / 1.00   | 0.98 / 0.98   | 0.96 / 0.98   | 0.98 / 0.99   | 0.99 / 0.99   | 1.00 / 1.00   | 0.96 / 1.00   | 0.99 / 1.00   |
| $\Delta\lambda_{ft}$ | 0.11 / 0.10   | 0.13 / 0.13   | 0.17 / 0.06   | 0.15 / 0.09   | 0.15 / 0.09   | 0.16 / 0.06   | 0.12 / 0.05   | 0.12 / 0.07   |
| $T_{d,down}$         | 9 / 7         | 9 / 9         | 9 / 7         | 10 / 9        | 7 / 5         | 5 / 8         | 8 / 9         | 10 / 6        |
|                      | 65            | 66            | 67            | 68            |               |               |               |               |
| $\theta_{d,min}$     | 0.009 / 0.004 | 0.010 / 0.010 | 0.010 / 0.001 | 0.007 / 0.002 |               |               |               |               |
| $\Delta\theta_d$     | 0.003 / 0.002 | 0.003 / 0.003 | 0.002 / 0.001 | 0.004 / 0.001 |               |               |               |               |
| $T_{d,up}$           | 9 / 2         | 7 / 7         | 5 / 5         | 10 / 1        |               |               |               |               |
| $\lambda_{ft,max}$   | 0.97 / 0.98   | 1.00 / 1.00   | 0.90 / 1.00   | 0.98 / 1.00   |               |               |               |               |
| $\Delta\lambda_{ft}$ | 0.13 / 0.07   | 0.17 / 0.17   | 0.20 / 0.05   | 0.14 / 0.08   |               |               |               |               |
| $T_{d,down}$         | 9 / 10        | 9 / 9         | 10 / 10       | 5 / 10        |               |               |               |               |

Table 7: Landmark-wise detection performance on COFW.

|       | 1     | 2     | 3     | 4     | 5     | 6     | 7     | 8    | 9     | 10    | 11    | 12    | 13    | 14    |
|-------|-------|-------|-------|-------|-------|-------|-------|------|-------|-------|-------|-------|-------|-------|
| NME   | 10.42 | 9.37  | 8.24  | 8.34  | 8.70  | 8.40  | 9.10  | 8.45 | 8.26  | 7.34  | 6.53  | 6.49  | 7.70  | 6.81  |
| $T_d$ | 6.98  | 7.15  | 10.96 | 8.30  | 11.21 | 10.99 | 10.42 | 8.90 | 11.26 | 8.46  | 11.85 | 11.74 | 7.89  | 9.33  |
|       | 15    | 16    | 17    | 18    | 19    | 20    | 21    | 22   | 23    | 24    | 25    | 26    | 27    | 28    |
| NME   | 6.18  | 6.06  | 7.29  | 6.07  | 8.04  | 7.09  | 8.42  | 7.80 | 10.26 | 9.66  | 8.67  | 8.62  | 9.47  | 10.45 |
| $T_d$ | 9.95  | 8.54  | 11.43 | 12.43 | 10.45 | 10.50 | 8.91  | 9.44 | 10.40 | 11.93 | 10.11 | 11.63 | 12.04 | 10.15 |
|       | 29    | mean  |       |       |       |       |       |      |       |       |       |       |       |       |
| NME   | 12.02 | 8.28  |       |       |       |       |       |      |       |       |       |       |       |       |
| $T_d$ | 18.36 | 10.42 |       |       |       |       |       |      |       |       |       |       |       |       |

---

**Algorithm 1** Operation of proposed agent.

---

**Input:**  $c$ , Image,  $\mathbf{x}$ ,  $t_{\max}$   $\theta_{d,\min} \in \mathbb{R}^2$ ,  $\Delta\theta_d \in \mathbb{R}^2$ ,  $T_{d,\text{up}} \in \mathbb{R}^2$ ,  $\lambda_{\text{ft},\max} \in \mathbb{R}^2$ ,  $\Delta\lambda_{\text{ft}} \in \mathbb{R}^2$ ,  $T_{d,\text{down}} \in \mathbb{R}^2$

**Output:**  $\hat{\mathbf{x}}_c$

```

1:  $z_{c,\text{ft}}^*, z_{c,\text{cd}}^* \leftarrow \text{Prior knowledge modeling}(c)$ 
2:  $\hat{\mathbf{x}}_c \leftarrow \text{NULL}$ 
3: for stage = 0 to 1 do
4:    $\theta_d \leftarrow \theta_{d,\min}[\text{stage}]$ 
5:    $\Delta\theta_d \leftarrow \Delta\theta_d[\text{stage}]$ 
6:    $T_{d,\text{up}} \leftarrow T_{d,\text{up}}[\text{stage}]$ 
7:    $\lambda_{\text{ft}} \leftarrow \lambda_{\text{ft},\max}[\text{stage}]$ 
8:    $\lambda_{\text{cd}} \leftarrow 1 - \lambda_{\text{ft}}$ 
9:    $\Delta\lambda_{\text{ft}} \leftarrow \Delta\lambda_{\text{ft}}[\text{stage}]$ 
10:   $T_{d,\text{down}} \leftarrow T_{d,\text{down}}[\text{stage}]$ 
11:   $\hat{\Lambda} \leftarrow \{\lambda_{\text{ft}}[t] | \forall t \in [0, t_{\max}]\}$ 
12:  for  $t = 0$  to  $t_{\max}$  do
13:     $\mathbf{o} \leftarrow \text{Observation by agent}(\text{Image}, \mathbf{x})$ 
14:     $z_{\text{ft}}, z_{\text{cd}}, \hat{\mathbf{x}} \leftarrow \text{Data extraction}(\mathbf{o})$ 
15:     $D_{\text{ft}}, D_{\text{cd}}, D \leftarrow \text{DistComp}(z_{(\cdot)}, z_{c,(\cdot)}^*, \lambda_{(\cdot)}), \quad \text{where } (\cdot) \in \{\text{ft}, \text{cd}\}$ 
16:     $\hat{\mathbf{x}}_c \leftarrow \text{Delayed decision}(\hat{\Lambda}, D_{\text{ft}}, D_{\text{cd}}, \theta_d, \lambda_{\text{ft}}, \hat{\mathbf{x}})$ 
17:    if  $\hat{\mathbf{x}}_c \neq \text{NULL}$  then
18:       $\mathbf{x} \leftarrow \hat{\mathbf{x}}_c$ 
19:      Terminate.
20:    end if
21:    if  $t \geq T_{d,\text{up}}$  then
22:       $\theta_d \leftarrow \theta_d + \Delta\theta_d$ 
23:    end if
24:    if  $t \geq T_{d,\text{down}}$  and  $t - T_{d,\text{down}} = \text{even}$  then
25:       $\lambda_{\text{ft}} \leftarrow \lambda_{\text{ft}} - \Delta\lambda_{\text{ft}}$ 
26:    end if
27:     $s \cdot \mathbf{u}^* \leftarrow \text{Hopping policy}(D, z_{(\cdot)}, z_{c,(\cdot)}^*, \lambda_{(\cdot)}), \quad \text{where } (\cdot) \in \{\text{ft}, \text{cd}\}$ 
28:     $\mathbf{x} \leftarrow \mathbf{x} + s \cdot \mathbf{u}^*$ 
29:  end for
30: end for

```

---

Table 8: Landmark-wise detection performance on 300W.

|       | 1     | 2     | 3     | 4     | 5     | 6     | 7     | 8     | 9     | 10    | 11    | 12    | 13           | 14    |
|-------|-------|-------|-------|-------|-------|-------|-------|-------|-------|-------|-------|-------|--------------|-------|
| NME   | 13.68 | 12.68 | 13.01 | 14.51 | 13.38 | 13.03 | 11.97 | 10.73 | 9.74  | 10.28 | 11.00 | 12.07 | 13.56        | 13.07 |
| $T_d$ | 23.80 | 18.83 | 19.67 | 17.83 | 19.50 | 16.92 | 14.56 | 11.92 | 13.67 | 15.09 | 14.54 | 16.09 | 18.78        | 26.02 |
|       | 15    | 16    | 17    | 18    | 19    | 20    | 21    | 22    | 23    | 24    | 25    | 26    | 27           | 28    |
| NME   | 12.83 | 12.13 | 14.06 | 10.62 | 9.49  | 10.33 | 9.87  | 10.70 | 9.44  | 9.49  | 9.97  | 9.49  | 10.67        | 8.25  |
| $T_d$ | 24.22 | 17.37 | 21.61 | 8.57  | 10.11 | 6.50  | 13.94 | 10.13 | 11.92 | 13.07 | 10.88 | 11.47 | 9.63         | 14.60 |
|       | 29    | 30    | 31    | 32    | 33    | 34    | 35    | 36    | 37    | 38    | 39    | 40    | 41           | 42    |
| NME   | 9.53  | 13.00 | 15.99 | 11.52 | 10.85 | 10.92 | 10.96 | 11.00 | 6.43  | 6.11  | 6.31  | 8.02  | 6.69         | 6.61  |
| $T_d$ | 12.26 | 6.81  | 14.23 | 20.55 | 19.95 | 19.24 | 19.66 | 21.35 | 13.48 | 8.53  | 9.19  | 10.61 | 7.35         | 9.39  |
|       | 43    | 44    | 45    | 46    | 47    | 48    | 49    | 50    | 51    | 52    | 53    | 54    | 55           | 56    |
| NME   | 7.08  | 5.85  | 6.13  | 6.11  | 5.93  | 6.10  | 8.25  | 7.14  | 7.54  | 7.41  | 7.72  | 6.81  | 8.61         | 7.28  |
| $T_d$ | 11.79 | 7.19  | 8.88  | 10.97 | 7.51  | 10.56 | 9.70  | 8.64  | 8.98  | 14.70 | 7.92  | 8.48  | 7.51         | 9.77  |
|       | 57    | 58    | 59    | 60    | 61    | 62    | 63    | 64    | 65    | 66    | 67    | 68    | <b>mean</b>  |       |
| NME   | 7.41  | 6.55  | 7.09  | 7.29  | 7.62  | 6.71  | 6.45  | 7.00  | 7.67  | 7.26  | 6.80  | 7.26  | <b>9.36</b>  |       |
| $T_d$ | 9.22  | 6.97  | 7.14  | 12.01 | 7.28  | 8.08  | 9.13  | 11.54 | 7.45  | 8.92  | 13.94 | 10.31 | <b>12.77</b> |       |
